# Supplementary material for: Functions of COP1/SPA E3 Ubiquitin Ligase Mediated by MpCRY in the Liverwort Marchantia polymorpha under Blue Light
Source: MDPI journal article supplement (doi:10.3390/ijms23010158), 2021-12-23
Supplement: s1 [file s1]

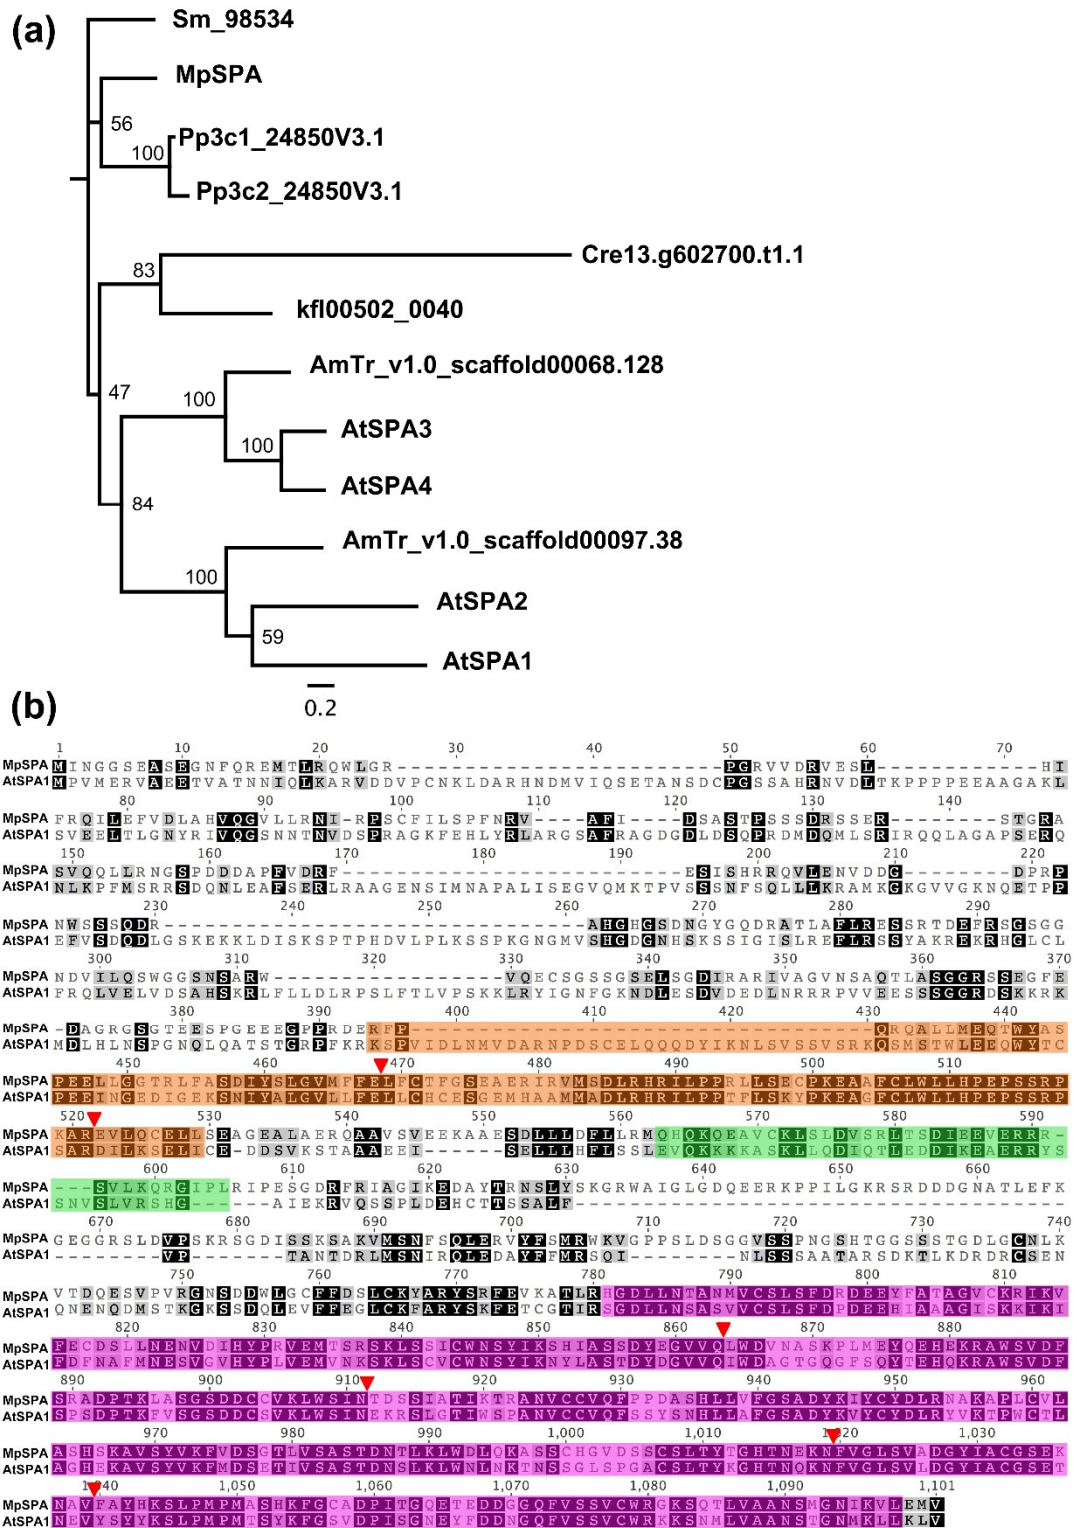

**Figure S1. Phylogenetic analysis of SPA proteins from green algae and land plants. (a)** Phylogenetic relationships of plant SPA proteins. The tree was constructed using 12 SPA proteins from various plant species. Posterior probabilities are indicated at the nodes. At, *Arabidopsis thaliana*; AmTr, *Amborella trichopoda*; Sm, *Selaginella moellendorffii*; Pp, *Physcomitrium patens*; Kfl, *Klebsormidium nitens*; Cre, *Chlamydomonas reinhardtii*. Bar indicates 0.2 substitutions per site. **(b)** Alignment of amino acid sequences of the SPA protein from *M. polymorpha* and *A.*

*thaliana*. Identical and similar amino acid residues are highlighted with black and gray boxes, respectively. Orange background sequences indicate the kinase domain. Green background sequences indicate the coiled-coil domain. Purple background sequences indicate the WD40 domain. Red arrowheads indicate positions corresponding to intron insertion in the genes.

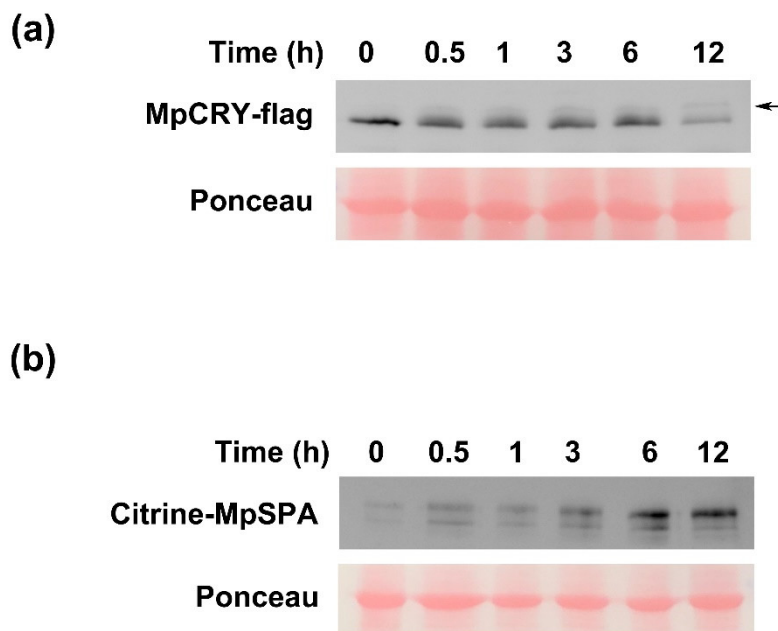

**Figure S2. Levels of Citrine-MpSPA1 and MpCRY-Flag proteins in *M. polymorpha* under BL.**

**(a)** Gemmae expressing MpCRY-Flag were plated on Gamborg's B5 medium under white light for 12 days and then were treated in the dark for 2 days. The gemmalings were then transferred to BL ( $30 \mu\text{mol m}^{-2} \text{s}^{-1}$ ) for indicated time. The levels of MpCRY-Flag were estimated by immunoblot. The immunoprecipitation signals were probed by anti-Flag. Black arrow represents phosphorylated MpCRY-Flag. **(b)** Gemmae expressing Citrine-MpSPA were plated on Gamborg's B5 medium under white light for 12 days and then were treated in the dark for 2 days. The gemmalings were then transferred to BL ( $30 \mu\text{mol m}^{-2} \text{s}^{-1}$ ) for indicated time. The levels of Citrine-MpSPA were estimated by immunoblot. The immunoprecipitation signals were probed by anti-Citrine.

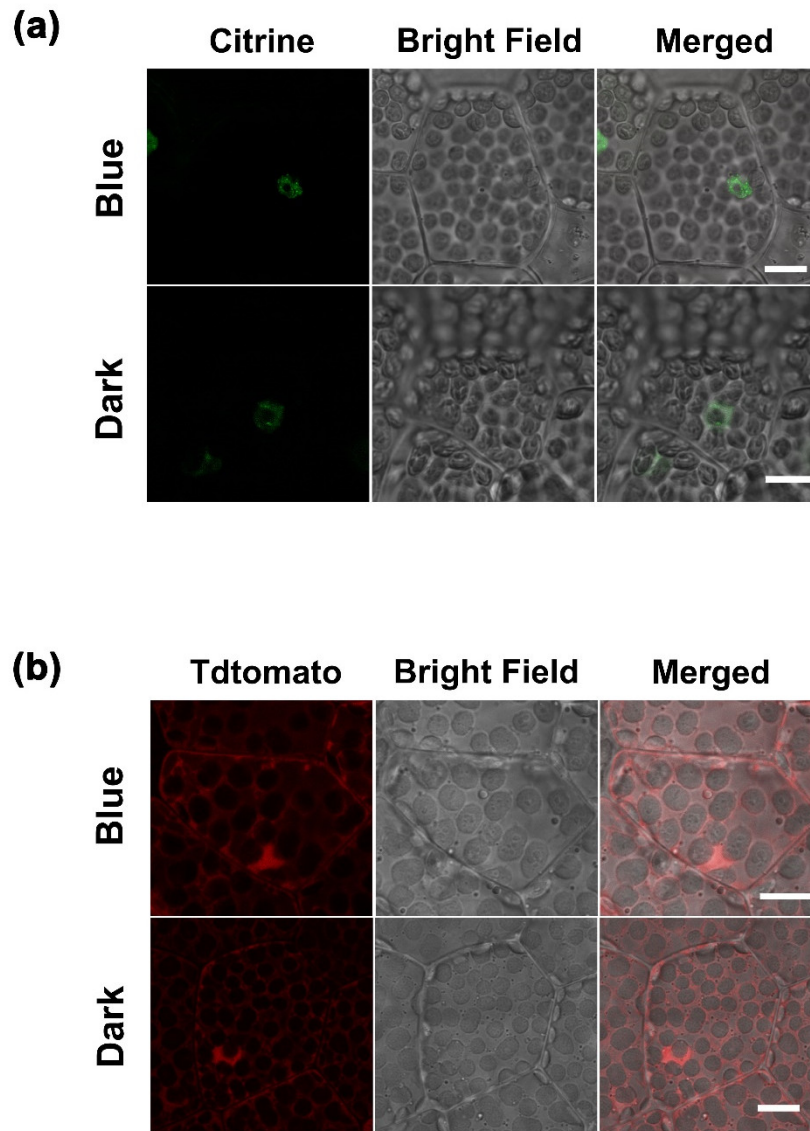

**Figure S3. The subcellular localization of MpCRY-Tdtomato and Citrine-MpSPA1 in *M. polymorpha*.** (A) Gemmae expressing MpCRY-Tdtomato were plated on Gamborg's B5 medium and imbibed in the dark for 3 days. Then the gemmalings were incubated under BL ( $30 \mu\text{mol m}^{-2} \text{s}^{-1}$ ) or kept in the dark for 6 h. Leica TCS SP8X confocal microscope was used to observe the gemmalings. Bar =  $10 \mu\text{m}$ . (B) Gemmae expressing Citrine-MpSPA were plated on Gamborg's B5 medium and imbibed in the dark for 3 days. Then the gemmalings were incubated under BL ( $30 \mu\text{mol m}^{-2} \text{s}^{-1}$ ) or kept in the dark for 6 h. Leica TCS SP8X confocal microscope was used to observe the gemmalings. Bar =  $10 \mu\text{m}$ .

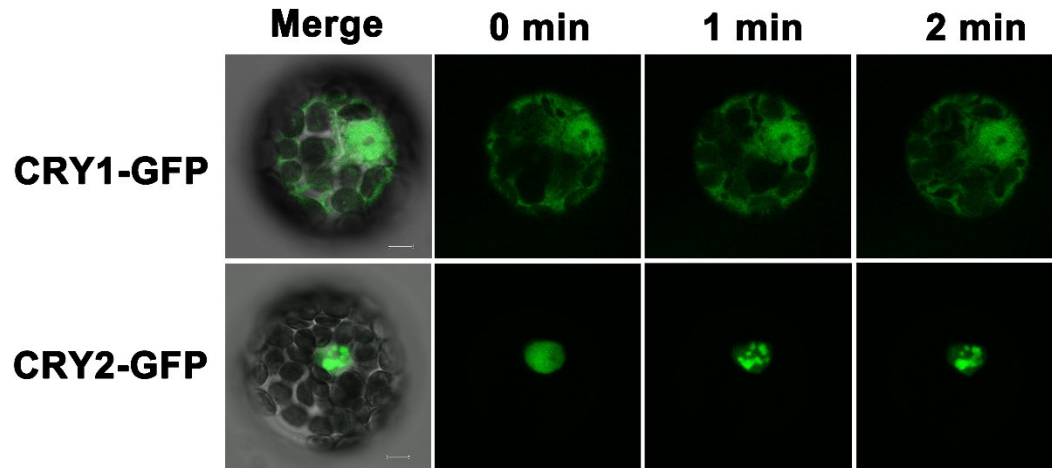

**Figure S4. AtCRY1 failed to form photobodies when expressed alone.** Plasmids expressing CRY1-GFP and CRY2-GFP were transfected into *Arabidopsis* protoplasts. After 14h, dark incubated protoplasts were activated by blue light (488 nm) laser at indicated time. scale bar = 5  $\mu$ m. Similar results were observed in 3 independent repeats.
