# Supplementary material for: Functions of COP1/SPA E3 Ubiquitin Ligase Mediated by MpCRY in the Liverwort Marchantia polymorpha under Blue Light
Source: Int J Mol Sci. 2021 Dec 23;23(1):158. doi: 10.3390/ijms23010158 (PMC8745113; doi:10.3390/ijms23010158)
Supplement: Supplementary file 1 [file ijms-23-00158-s001.zip › ijms-1504820-suppl/SPA1 Table S1.xlsx]

## Sheet: Sheet1
Primer name	Sequence	Assay
pGADT7-MpSPA-F	5'-TGGAGGCCAGTGAATTCATGATTAATGGAGGGTCGG-3'	Yeas two hybrid
pGADT7-MpSPA-R	5'-CGAGCTCGATGGATCCCTACACCATTTCCAAAACTT-3'
pGADT7-MpSPA kinase-F	5'-TGGAGGCCAGTGAATTCATGATTAATGGAGGGTCGG-3'
pGADT7-MpSPA kinase-R	5'-CGAGCTCGATGGATCCCTACGATTCCGCGGCTTTCT-3'
pGADT7-MpSPA CC-F	5'-TGGAGGCCAGTGAATTCATGAGGGAAGTTCTTCAGTG-3'
pGADT7-MpSPA CC-R	5'-CGAGCTCGATGGATCCTCATCTGAATTCCCTCTTAC-3'
pGADT7-MpSPA kinase+CC-F	5'-TGGAGGCCAGTGAATTCATGATTAATGGAGGGTCGG-3'
pGADT7-MpSPA kinase+CC-R	5'-CGAGCTCGATGGATCCTCATCTGAATTCCCTCTTAC-3'
pGADT7-MpSPA WD40-F	5'-TGGAGGCCAGTGAATTCATGGTAAGAGGGAATTCAGA-3'
pGADT7-MpSPA WD40-R	5'-CGAGCTCGATGGATCCCTACACCATTTCCAAAACTT-3'
pGADT7-MpCOP-F	5'-TGGAGGCCAGTGAATTCATGGAGGGTACTGAGGGCTC-3'
pGADT7-MpCOP-R	5'-CGAGCTCGATGGATCCTCAAGGAGCAAGCACAAGCAC-3'
pGADT7-MpCOP ring finger-F	5'-TGGAGGCCAGTGAATTCATGGAGGGTACTGAGGGCTC-3'
pGADT7-MpCOP ring finger-R	5'-CGAGCTCGATGGATCCCTATGACACCTCTCCCTGCT-3'
pGADT7-MpCOP CC-F	5'-TGGAGGCCAGTGAATTCATGGGACTCTACTTGACGAA-3'
pGADT7-MpCOP CC-R	5'-CGAGCTCGATGGATCCCTAGCTGTAACGGGTAAACG-3'
pGADT7-MpCOP WD40-F	5'-TGGAGGCCAGTGAATTCATGTCTGGCCTTGAAGACTT-3'
pGADT7-MpCOP WD40-R	5'-CGAGCTCGATGGATCCTCAAGGAGCAAGCACAAGCAC-3'
pGADT7-MpCOP ring finger+CC-F	5'-TGGAGGCCAGTGAATTCATGGAGGGTACTGAGGGCTC-3'
pGADT7-MpCOP ring finger+CC-R	5'-CGAGCTCGATGGATCCCTAGCTGTAACGGGTAAACG-3'
pGADT7-MpHY5-F	5'-TGGAGGCCAGTGAATTCATGAATGAAGTGGAGTCTC-3'
pGADT7-MpHY5-R	5'-CGAGCTCGATGGATCCTTATTGCATGCCTGTTGGAC-3'
pGADT7-MpHY5N-F	5'-TGGAGGCCAGTGAATTCATGAATGAAGTGGAGTCTC-3'
pGADT7-MpHY5N-R	5'-CGAGCTCGATGGATCCTTAATTACCGTCTTTCTTCG-3'
pGADT7-MpHY5C-F	5'-TGGAGGCCAGTGAATTCATGGAAAGCGACTCCGATGT-3'
pGADT7-MpHY5C-R	5'-CGAGCTCGATGGATCCTTATTGCATGCCTGTTGGAC-3'
pGBKT7-MpCRY-F	5'-TGGCCATGGAGGCCGAATTCATGGCCGCTCGCACTATCGT-3'
pGBKT7-MpCRY-R	5'-CGCTGCAGGTCGACGGATCCCTAAGCCGACAGTGAACTTG-3'
pGBKT7-MpCRYN-F	5'-TGGCCATGGAGGCCGAATTCATGGCCGCTCGCACTATCGT-3'
pGBKT7-MpCRYN-R	5'-CGCTGCAGGTCGACGGATCCCTACCACATTTCTGCCAGTG-3'
pGBKT7-MpCRYC-F	5'-TGGCCATGGAGGCCGAATTCCTAGAACGCGAGGCAGCTTC-3'
pGBKT7-MpCRYC-R	5'-CGCTGCAGGTCGACGGATCCCTAAGCCGACAGTGAACTTG-3'
pGBKT7-MpSPA-F	5'-TGGCCATGGAGGCCGAATTCATGATTAATGGAGGGTCGG-3'
pGBKT7-MpSPA-R	5'-CGCTGCAGGTCGACGGATCCCTACACCATTTCCAAAACTT-3'
pGBKT7-MpSPA kinase-F	5'-TGGCCATGGAGGCCGAATTCATGATTAATGGAGGGTCGG-3'
pGBKT7-MpSPA kinase-R	5'-CGCTGCAGGTCGACGGATCCCTACGATTCCGCGGCTTTCT-3'
pGBKT7-MpSPA CC-F	5'-TGGCCATGGAGGCCGAATTCATGAGGGAAGTTCTTCAGTG-3'
pGBKT7-MpSPA CC-R	5'-CGCTGCAGGTCGACGGATCCTCATCTGAATTCCCTCTTAC-3'
pGBKT7-MpSPA kinase+CC-F	5'-TGGCCATGGAGGCCGAATTCATGATTAATGGAGGGTCGG-3'
pGBKT7-MpSPA kinase+CC-R	5'-CGCTGCAGGTCGACGGATCCTCATCTGAATTCCCTCTTAC-3'
pGBKT7-MpSPA WD40-F	5'-TGGCCATGGAGGCCGAATTCATGGTAAGAGGGAATTCAGA-3'
pGBKT7-MpSPA WD40-R	5'-CGCTGCAGGTCGACGGATCCCTACACCATTTCCAAAACTT-3'
MpCRY-gRNA-F	5'-CTCGGCTGGCATGCGTGAGCTC-3'	Generation of transgenic lines
MpCRY-gRNA-R	5'-AAACGAGCTCACGCATGCCAGC-3'
MpSPA1-gRNA-F	5'-CTCGCATGGTACGCGAGCCCAGG-3'
MpSPA1-gRNA-R	5'-AAACCCTGGGCTCGCGTACCATG-3'
MpCRY-Tdtomato-F	5'-CACCATGGCCGCTCGCACTATC-3'
MpCRY-Tdtomato-R	5'-TCGATGTATTCTGGGTTCACG-3'
Citrien-MpSPA1-F	5'-AACCAATTCAGTCGACATGATTAATGGAGGGTCGG-3'
Citrien-MpSPA1-R	5'-ATCTCGAGTGCGGCCGCCACCATTTCCAAAACTTTGAT-3'
MpCRY-Flag-F	5'-CACCATGGCCGCTCGCACTATC-3'
MpCRY-Flag-R	5'-TCGATGTATTCTGGGTTCACG-3'
HY5-Citrien-F	5'-CACCATGAATGAAGTGGAGTCTCAAG-3'
HY5-Citrien-R	5'-TTGCATGCCTGTTGGAC-3'
pCI-MpCRY-F	5'-GCGTGGTACCTCTAGAATGGCCGCTCGCACTATCGT-3'	Co-immunoprecipitation in HEK293T cells
pCI-MpCRY-R	5'-GAAGCGGCCGCCCGGGCTAAGCCGACAGTGAACTTG-3'
pCI-MpSPA-F	5'-GCGTGGTACCTCTAGAATGATTAATGGAGGGTCGG-3'
pCI-MpSPA-R	5'-GAAGCGGCCGCCCGGGCTACACCATTTCCAAAACTT-3'
pCI-MpCOP-F	5'-GCGTGGTACCTCTAGAATGGAGGGTACTGAGGGCTC-3'
pCI-MpCOP-R	5'-GAAGCGGCCGCCCGGGTCAAGGAGCAAGCACAAGCAC-3'
pCI-MpHY5-F	5'-GCGTGGTACCTCTAGAATGAATGAAGTGGAGTCTC-3'
pCI-MpHY5-R	5'-GAAGCGGCCGCCCGGGTTATTGCATGCCTGTTGGAC-3'
His-GFP-MpHY5-F	5'-ATGGTGAGCAAGGGCGCCGTCGCGGATCCGAATTC-3'	In vitro stability assay
His-GFP-MpHY5-R	5'-TTATTGCATGCCTGTTGGACGTGCGGCCGCAAGCTT-3'
